# Supplementary material for: Suitability of MRF Recovered Post-Consumer Polypropylene Applications in Extrusion Blow Molded Bottle Food Packaging
Source: MDPI journal article supplement (doi:10.3390/polym15163471), 2023-08-19
Supplement: s1 [file s1]

## Supplementary Materials

### List of Abbreviations

|                                                                                                                                                                                                                                             |    |
|---------------------------------------------------------------------------------------------------------------------------------------------------------------------------------------------------------------------------------------------|----|
| ANOVA (Analysis of Variance)                                                                                                                                                                                                                | 1  |
| ASTM (American Society for Testing and Materials)                                                                                                                                                                                           | 2  |
| ATR-FTIR (Attenuated Total Reflectance Fourier-Transform Infrared Spectroscopy)                                                                                                                                                             | 3  |
| BHT (Butylated Hydroxytoluene)                                                                                                                                                                                                              | 4  |
| BPF (Bisphenol-F)                                                                                                                                                                                                                           | 5  |
| BPA (Bisphenol-A)                                                                                                                                                                                                                           | 6  |
| BPB (Bisphenol-B)                                                                                                                                                                                                                           | 7  |
| BPS (Bisphenol-S)                                                                                                                                                                                                                           | 8  |
| BADGE (Bisphenol A diglycidyl ether)                                                                                                                                                                                                        | 9  |
| CAGR (Compound Annual Growth Rate)                                                                                                                                                                                                          | 10 |
| CFR (Code of Federal Regulations)                                                                                                                                                                                                           | 11 |
| CONEG (Coalition of Northeastern Governors)                                                                                                                                                                                                 | 12 |
| CRD (Complete Randomized Design)                                                                                                                                                                                                            | 13 |
| DEP (Di-ethyl phthalate)                                                                                                                                                                                                                    | 14 |
| DIBP (di-isobutyl phthalate)                                                                                                                                                                                                                | 15 |
| DPENP (di-butyl phthalate (DBP), Dipentyl phthalate)                                                                                                                                                                                        | 16 |
| DHEXP (dihexyl phthalate)                                                                                                                                                                                                                   | 17 |
| DCHP (di-cyclohexyl phthalate)                                                                                                                                                                                                              | 18 |
| DEHP ( di-(2-ethylhexyl) phthalate)                                                                                                                                                                                                         | 19 |
| DINP (Diisononyl phthalate)                                                                                                                                                                                                                 | 20 |
| DIDP (diisodecyl phthalate)                                                                                                                                                                                                                 | 21 |
| DSC (Differential Scanning Calorimetry)                                                                                                                                                                                                     | 22 |
| EBM (Extrusion Blow Molding)                                                                                                                                                                                                                | 23 |
| EPA (Environmental Protection Agency)                                                                                                                                                                                                       | 24 |
| EPR (Extended Producer Responsibility)                                                                                                                                                                                                      | 25 |
| EPT (Ethyl P-Toluate)                                                                                                                                                                                                                       | 26 |
| Hm (Melting Enthalpy)                                                                                                                                                                                                                       | 27 |
| HSD (Honestly Significance Difference)                                                                                                                                                                                                      | 28 |
| ICP-OES (Inductively Coupled Plasma-Optical Emission Spectrometry)                                                                                                                                                                          | 29 |
| LDPE (Low Density Polyethylene)                                                                                                                                                                                                             | 30 |
| LOD (Limit of Detection)                                                                                                                                                                                                                    | 31 |
| LOQ (Limit of Quantification)                                                                                                                                                                                                               | 32 |
| MOE (Modulus of Elasticity)                                                                                                                                                                                                                 | 33 |
| MRM (Multiple Reaction Monitor)                                                                                                                                                                                                             | 34 |
| MRF (Material Recovery Facility)                                                                                                                                                                                                            | 35 |
| NaOH (Sodium Hydroxide)                                                                                                                                                                                                                     | 36 |
| NIST (Natiuonal Instituite of Standards and Technology)                                                                                                                                                                                     | 37 |
| N/IAS: Non-Intentionally/ Intentionally Added Substances. Definition: Substances that are present in a product or material as a result of the manufacturing process, recycling but are not deliberately added for a specific function (Non- | 38 |
|                                                                                                                                                                                                                                             | 39 |
|                                                                                                                                                                                                                                             | 40 |
|                                                                                                                                                                                                                                             | 41 |
|                                                                                                                                                                                                                                             | 42 |

|                                                                                                                                                                                                                                                                         |    |
|-------------------------------------------------------------------------------------------------------------------------------------------------------------------------------------------------------------------------------------------------------------------------|----|
| intentionally added). Substances that are present in a product or material and are deliberately added for a specific function (intentionally added).                                                                                                                    | 43 |
| OIT (Oxygen Induction Time)                                                                                                                                                                                                                                             | 44 |
| OTR (Oxygen Transmission Rate)                                                                                                                                                                                                                                          | 45 |
| PCR (Post-Consumer Recycled)                                                                                                                                                                                                                                            | 46 |
| PE (Polyethylene)                                                                                                                                                                                                                                                       | 47 |
| PET (Polyethylene terephthalate)                                                                                                                                                                                                                                        | 48 |
| PFAS (Per- and polyfluoroalkyl substances)                                                                                                                                                                                                                              | 49 |
| PP (Polypropylene)                                                                                                                                                                                                                                                      | 50 |
| PS (Polystyrene)                                                                                                                                                                                                                                                        | 51 |
| PVC (Polyvinyl Chloride)                                                                                                                                                                                                                                                | 52 |
| REACH (Registration, Evaluation, Authorisation, and Restriction of Chemicals)                                                                                                                                                                                           | 53 |
| SD (Standard Deviation)                                                                                                                                                                                                                                                 | 54 |
| Tm (Melting Temperature)                                                                                                                                                                                                                                                | 55 |
| TPCH: Toxics in Packaging Clearinghouse. Definition: is an organization that promotes the implementation of state laws that prohibit the use of heavy metals such as lead, mercury, cadmium, hexavalent chromium, phthalates, PFAS etc. in product packaging materials. | 56 |
| WVTR (Water Vapor Transmission Rate)                                                                                                                                                                                                                                    | 57 |
|                                                                                                                                                                                                                                                                         | 58 |
|                                                                                                                                                                                                                                                                         | 59 |
|                                                                                                                                                                                                                                                                         | 60 |
|                                                                                                                                                                                                                                                                         | 61 |
|                                                                                                                                                                                                                                                                         | 62 |
|                                                                                                                                                                                                                                                                         | 63 |

**Table S1.** Optimized EBM parameters for post-consumer PP bottle processing

| Temperature zone setting | °F  | Other parameters  | Seed |
|--------------------------|-----|-------------------|------|
| Rear                     | 365 | Screw speed (RPM) | 75   |
| Transition               | 370 | Clamp 1 close     | 80   |
| Metering                 | 370 | Clamp 2 close     | 15   |
| Head 1                   | 375 | Clamp open        | 70   |
| Head 2                   | 375 | Clamp daylight    | 30   |
| Molds                    | ~68 | Clamp delay       | 10   |
| Air pressure (psi)       | 90  | Shuttle left      | 120  |
| Pre-blow (psi)           | 10  | Shuttle right     | 120  |
| Cutter heat (%)          | ≤45 | Screw ideal       | 13   |

**Table S2:** Parameters of gas chromatographic analysis

| Parameter                 | Value                                            |
|---------------------------|--------------------------------------------------|
| <b>GC-MSD</b>             |                                                  |
| Carrier gas:              | He                                               |
| Column:                   | Agilent DB-5ms (250 µm x 0.25 µm film thickness) |
| Oven Temperature (start): | 40 °C (5 min)                                    |
| First Ramp:               | 7 °C/min until 220 °C (hold 0 min)               |
| Second Ramp:              | 7 °C/min until 300 °C (hold 3 min)               |

|                                              |                      |
|----------------------------------------------|----------------------|
| Oven Temperature (end):                      | 350 °C               |
| Injection Volume:                            | 1 µl                 |
| MSD Transfer Line:                           | 300 °C               |
| Scan parameter, mass-to-charge ratios (m/z): | 40-500               |
| Acquisition Mode:                            | Full scan, Splitless |

**GC-QqQ**

|                           |                                         |
|---------------------------|-----------------------------------------|
| He Quench Gas:            | 2.25 mL/min                             |
| N2 Collision Gas:         | 1.5 mL/min                              |
| Column:                   | Agilent DB-5MS, 30 m x 250 µm x 0.25 µm |
| Oven Temperature (start): | 40 °C                                   |
| First Ramp:               | 30 °C/min until 120 °C (hold 1 min)     |
| Second Ramp:              | 7.5 °C/min until 300 °C (hold 5 min)    |
| Oven Temperature (end):   | 300 °C                                  |
| Injection Volume:         | 1 µl                                    |
| MSD Transfer Line:        | 300 °C                                  |
| Acquisition Mode:         | Multiple reaction monitoring (MRM)      |

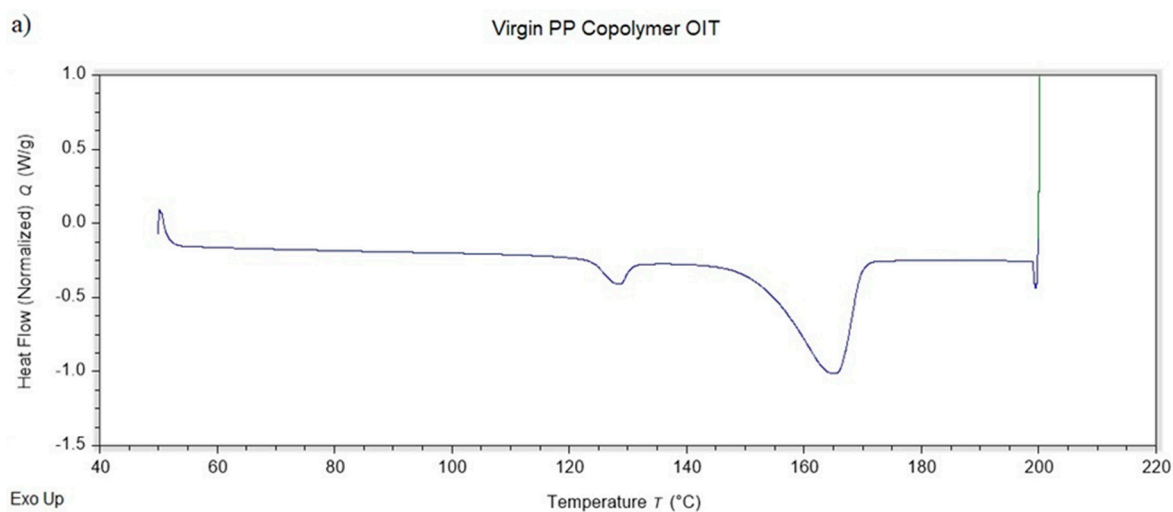

66

67

68

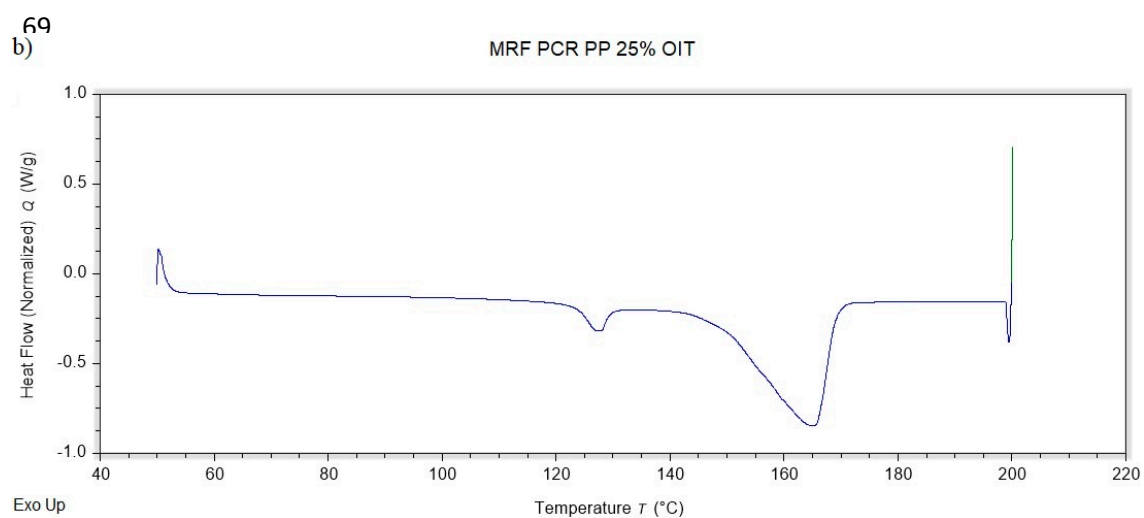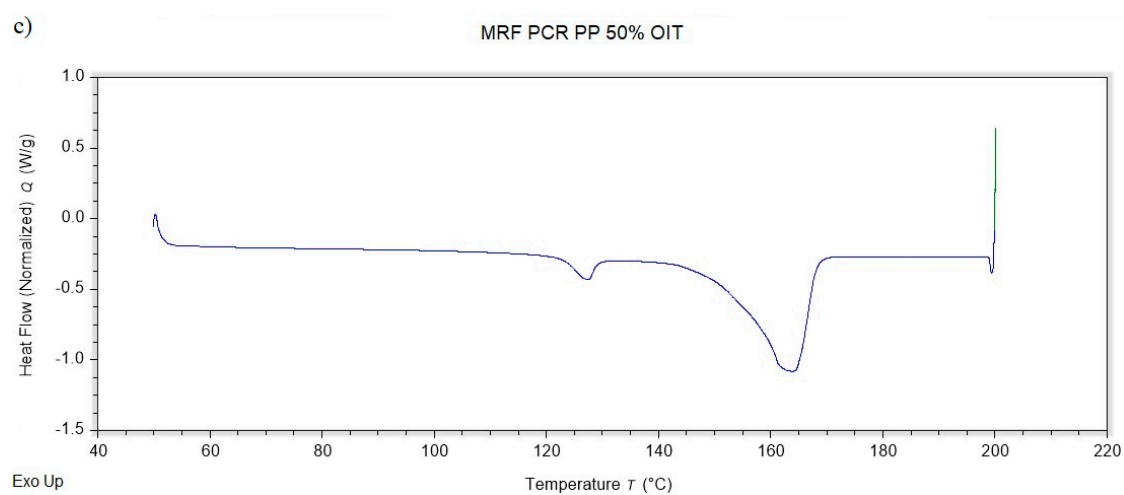

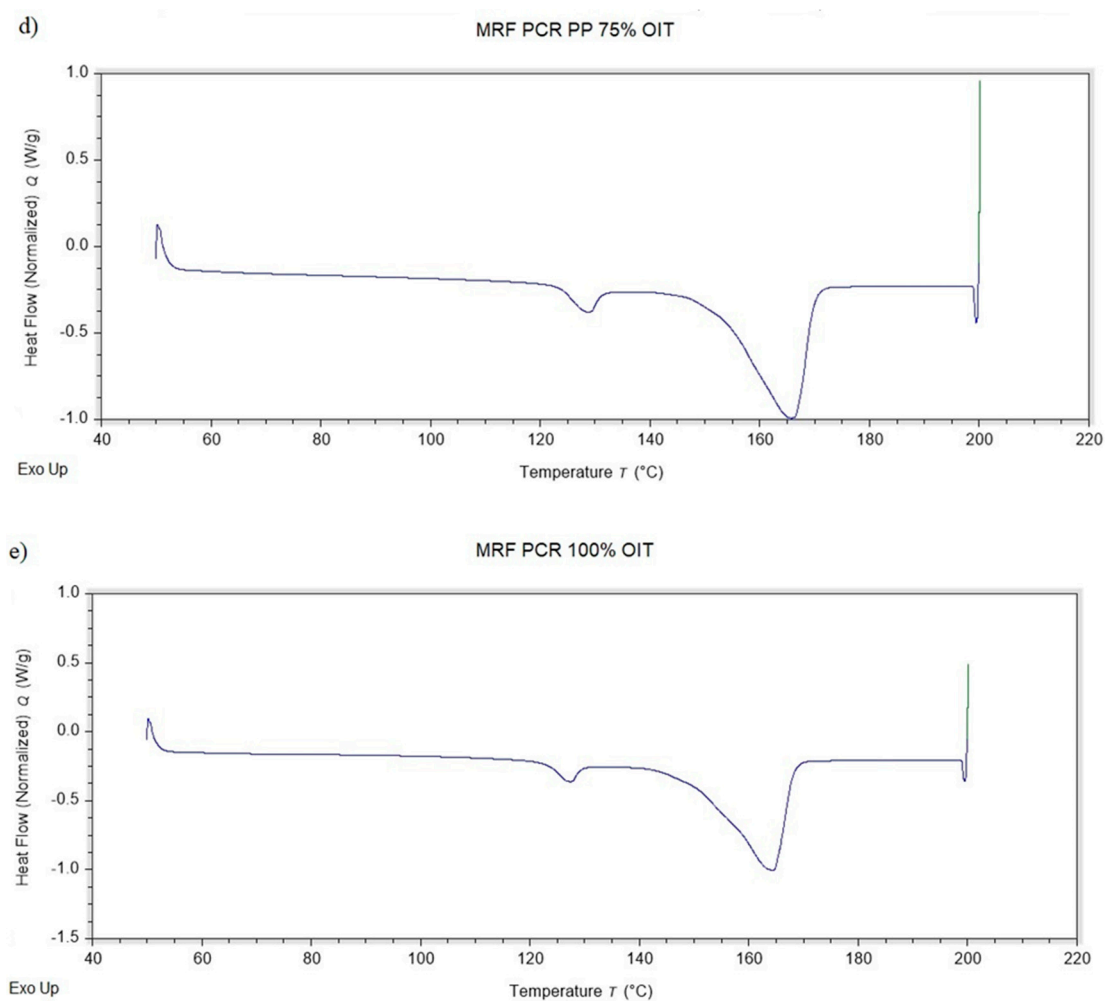

**Figure S1:** DSC OIT thermograms of a) Virgin PP Copolymer b) MRF PCR-PP 25% c) MRF PCR-PP 50% d) MRF PCR-PP 75% e) MRF PCR-PP 100%
